# Supplementary material
Source: HighWire-hosted journal article supplement (https://bjsm.bmj.com/content/52/12/769)
Supplement: inline-supplementary-material-1 [file inline-supplementary-material-1.zip]

| Set  | Results   |
|------|-----------|
| # 19 | 789       |
| # 18 | 4,289     |
| # 17 | 3,027,150 |
| # 16 | 13,409    |
| # 15 | 1,503,319 |
| # 14 | 49,547    |
| # 13 | 33,744    |
| # 12 | 105,955   |
| # 11 | 116,260   |
| # 10 | 107,702   |
| # 9  | 66,334    |
| # 8  | 49,306    |
| # 7  | 8,254     |
| # 6  | 128,386   |
| # 5  | 196,448   |
| # 4  | 452,746   |
| # 3  | 445,029   |
| # 2  | 413,758   |
| # 1  | 148,319   |

**Save search history and/or create an alertOpen a saved search history**

#17 AND #16 Indexes=SCI-EXPANDED, CPCI-S Timespan=2015-2017

#17 AND #16

TS=(random\* or blind\* or allocat\* or assign\* or trial\* or placebo\* or crossover\* or cross-over\*)

#15 AND #1

#14 OR #13 OR #12 OR #11 OR #10 OR #9 OR #8 OR #7 OR #6 OR #5 OR #4 OR #3 OR #2

TI=((heart or myocard\* or ischaem\* or ischem\* or coronary or cardiac or stroke) and risk\*))

TI=(((cardiovascular or cardio-vascular or cvd) and risk\*))

TS=(((heart or myocard\* or ischaem\* or ischem\* or coronary or cardiac or stroke) near/5 risk\*))

TS=(((cardiovascular or cardio-vascular or cvd) near/3 risk\*))

TS=(((blood or serum or plasma) near/3 (lipid\* or cholesterol\* or fat)))

TS=(hyperlipid\* or hypercholest\*)

TS=(((ldl or hdl) near/2 (lipdi\* or cholesterol\*)))

TS=(((low\* or high\* or measure\*) near/3 (lipid? or cholesterol?)))

TS=("body fat\*" or adiposity or "adipose tissue\*")

TS=("body mass index" or bmi or "waist circumference" or "waist measure\*" or (waist near/2 hip))

TS=(obes\* or overweight or "body weight")

TS=(hypertens\* or anti-hypertens\* or antihypertens\*)

TS=("blood pressure" or bp or sbp or dbp)

TS=(walk OR walking)
