# Supplementary material
Source: HighWire-hosted journal article supplement (https://bjsm.bmj.com/content/52/12/769)
Supplement: inline-supplementary-material-1 [file inline-supplementary-material-1.zip]

# ▲

- 1
- 2
- 3
- 4
- 5
- 6
- 7
- 8
- 9
- 10
- 11
- 12
- 13
- 14
- 15
- 16
- 17
- 18
- 19
- 20
- 21
- 22
- 23
- 24
- 25
- 26
- 27
- 28
- 29
- 30
- 31
- 32
- 33
- 34
- 35
- 36
- 37
- 38
- 39
- 40
- 41
- 42
- 43
- 44
- 45
- 46
- 47
- 48
- 49
- 50

51

52

53

## Searches

\*Walking/

(walk or walking).ti.

1 or 2

limit 3 to "reviews (maximizes specificity)"

Walking/

(walk or walking).ti,ab.

5 or 6

Blood Pressure/

Hypertension/

body weight/ or weight loss/

exp Obesity/

body mass index/ or exp waist circumference/ or waist-height ratio/

Adiposity/

exp Adipose Tissue/

Lipids/bl [Blood]

exp lipoproteins, hdl/ or exp lipoproteins, ldl/

hyperlipidemias/ or hypercholesterolemia/

Cardiovascular Diseases/pc or exp Myocardial Ischemia/pc or Stroke/pc

(blood pressure or bp or sbp or dbp).ti,ab.

(hypertens\* or anti-hypertens\* or antihypertens\*).ti,ab.

(obes\* or overweight or body weight).ti,ab.

(body mass index or bmi or waist circumference or waist measure or (waist adj2 hip)).ti,ab.

(body fat? or adiposity or adipose tissue\*).ti,ab.

((low\* or high\* or measure\*) adj3 (lipid? or cholesterol?)).ti,ab.

((ldl or hdl) adj2 (lipid\* or cholesterol\*)).ti,ab.

(hyperlipid\* or hypercholest\*).ti,ab.

((blood or serum or plasma) adj3 (lipid\* or cholesterol\* or fat)).ti,ab.

((cardiovascular or cardio-vascular or cvd) adj3 risk\*).ti,ab.

((heart or myocard\* or ischaem\* or ischem\* or coronary or cardiac or stroke) adj3 risk\*).ti,ab.

((cardiovascular or cardio-vascular or cvd) and risk\*).ti.

((heart or myocard\* or ischaem\* or ischem\* or coronary or cardiac or stroke) and risk\*).ti.

8 or 9 or 10 or 11 or 12 or 13 or 14 or 15 or 16 or 17 or 18 or 19 or 20 or 21 or 22 or 23 or 24 or 25 or 26 or

27 or 28 or 29 or 30 or 31

7 and 32

limit 33 to "reviews (maximizes specificity)"

4 or 34

(2015\* or 2016\* or 2017\*).ed,dc,yr.

35 and 36

randomized controlled trial.pt.

controlled clinical trial.pt.

randomized.ab.

placebo.ab.

drug therapy.fs.

randomly.ab.

trial.ab.

groups.ab.

38 or 39 or 40 or 41 or 42 or 43 or 44 or 45

exp animals/ not humans.sh.

46 not 47

3 and 48

7 and 32 and 48

49 or 50

(2015\* or 2016\* or 2017\*).ed,dc,yr.

51 and 52

## Results

15083  
16668  
23340  
322  
26770  
79415  
86068  
258426  
216535  
205201  
174188  
105720  
8556  
83999  
47030  
70472  
48327  
74737  
373121  
389081  
398728  
193295  
93964  
98185  
53094  
55780  
99084  
97280  
78495  
26118  
36772  
1749005  
  
13449  
244  
515  
3510360  
194  
457479  
93386  
397982  
187243  
1969738  
277093  
416839  
1706604  
4054023  
4366543  
3505127  
5559  
5145

9504

3510360

2494
