# Supplementary material
Source: HighWire-hosted journal article supplement (https://bjsm.bmj.com/content/52/12/769)
Supplement: inline-supplementary-material-1 [file inline-supplementary-material-1.zip]

**ID**

#1

#2

#3

#4

#5

#6

#7

#8

#9

#10

#11

#12

#13

#14

#15

#16

#17

## Search

walk or walking:ti Publication Year from 2012 to 2015 (Word variations have been searched)

walk or walking:ti,ab,kw (Word variations have been searched)

blood pressure or bp or sbp or dbp:ti,ab,kw (Word variations have been searched)

hypertens\* or anti-hypertens\* or antihypertens\*:ti,ab,kw (Word variations have been searched)

obes\* or overweight or "body weight":ti,ab,kw (Word variations have been searched)

body mass index or bmi or "waist circumference" or "waist measure\*" or (waist near/2 hip):ti,ab,kw (Word

body fat\* or adiposity or "adipose tissue\*":ti,ab,kw (Word variations have been searched)

((low\* or high\* or measure\*) near/3 (lipid? or cholesterol?)):ti,ab,kw (Word variations have been searched)

((ldl or hdl) near/2 (lipdi\* or cholesterol\*)):ti,ab,kw (Word variations have been searched)

hyperlipid\* or hypercholest\*:ti,ab,kw (Word variations have been searched)

((blood or serum or plasma) near/3 (lipid\* or cholesterol\* or fat)):ti,ab,kw (Word variations have been

((cardiovascular or cardio-vascular or cvd) near risk\*):ti,ab,kw (Word variations have been searched)

((heart or myocard\* or ischaem\* or ischem\* or coronary or cardiac or stroke) near risk\*):ti,ab,kw (Word

((cardiovascular or cardio-vascular or cvd) and risk\*):ti (Word variations have been searched)

((heart or myocard\* or ischaem\* or ischem\* or coronary or cardiac or stroke) and risk\*):ti,ab,kw (Word

#3 or #4 or #5 or #6 or #7 or #8 or #9 or #10 or #11 or #12 or #13 or #14 or #15

#2 and #16
