# Supplementary material
Source: HighWire-hosted journal article supplement (https://bjsm.bmj.com/content/52/12/769)
Supplement: inline-supplementary-material-1 [file inline-supplementary-material-1.zip]

**Search ID#**

S4

S3

S2

S1

**Search Terms**

S1 AND S2 Limiters - Published Date: 20150101-20171231

S1 AND S2

TI ( random\* or blind\* or allocat\* or assign\* or trial\* or placebo\* or crossover\* or cross-over\* ) OR AB ( random\* or blind\* or allocat\* or assign\* or trial\* or placebo\* or crossover\* or cross-over\* )

TI ( walk OR walking ) OR AB ( walk OR walking )

**Actions**

722

3,248

78,999

23,055
