# Supplementary material
Source: HighWire-hosted journal article supplement (https://bjsm.bmj.com/content/52/12/769)
Supplement: inline-supplementary-material-1 [file inline-supplementary-material-1.zip]

# ▲

- 1
- 2
- 3
- 4
- 5
- 6
- 7
- 8
- 9
- 10
- 11
- 12
- 13
- 14
- 15
- 16
- 17
- 18
- 19
- 20
- 21
- 22
- 23
- 24
- 25
- 26
- 27
- 28
- 29
- 30
- 31
- 32
- 33
- 34
- 35
- 36
- 37
- 38
- 39
- 40
- 41
- 42
- 43
- 44
- 45
- 46
- 47
- 48
- 49
- 50

51

52

Searches

\*Walking/

(walk or walking).ti.

1 or 2

limit 3 to "reviews (maximizes specificity)"

Walking/

(walk or walking).ti,ab.

5 or 6

Blood Pressure/

Hypertension/

body weight/ or weight change/ or weight reduction/

exp Obesity/

abdominal circumference/ or body fat/ or body mass/ or waist circumference/ or waist hip ratio/

exp adipose tissue/

\*lipid/

cholesterol ester/ or high density lipoprotein cholesterol/ or low density lipoprotein cholesterol/

hyperlipidemia/ or exp hypercholesterolemia/

Cardiovascular Diseases/pc or exp ischemic heart disease/pc or cerebrovascular accident/pc

exp cardiovascular risk/

(blood pressure or bp or sbp or dbp).ti,ab.

(hypertens\* or anti-hypertens\* or antihypertens\*).ti,ab.

(obes\* or overweight or body weight).ti,ab.

(body mass index or bmi or waist circumference or waist measure or (waist adj2 hip)).ti,ab.

(body fat? or adiposity or adipose tissue\*).ti,ab.

((low\* or high\* or measure\*) adj3 (lipid? or cholesterol?)).ti,ab.

((ldl or hdl) adj2 (lipdi\* or cholesterol\*)).ti,ab.

(hyperlipid\* or hypercholest\*).ti,ab.

((blood or serum or plasma) adj3 (lipid\* or cholesterol\* or fat)).ti,ab.

((cardiovascular or cardio-vascular or cvd) adj3 risk\*).ti,ab.

((heart or myocard\* or ischaem\* or ischem\* or coronary or cardiac or stroke) adj3 risk\*).ti,ab.

((cardiovascular or cardio-vascular or cvd) and risk\*).ti.

((heart or myocard\* or ischaem\* or ischem\* or coronary or cardiac or stroke) and risk\*).ti.

8 or 9 or 10 or 11 or 12 or 13 or 14 or 15 or 16 or 17 or 18 or 19 or 20 or 21 or 22 or 23 or 24 or 25 or 26 or

27 or 28 or 29 or 30 or 31

7 and 32

limit 33 to "reviews (maximizes specificity)"

4 or 34

(2015\* or 2016\* or 2017\*).dc,yr.

35 and 36

randomized controlled trial/

single blind procedure/ or double blind procedure/

crossover procedure/

random\*.tw.

((singl\* or doubl\*) adj (blind\* or mask\*)).tw.

(crossover or cross over or factorial\* or latin square).tw.

(assign\* or allocat\* or volunteer\*).tw.

38 or 39 or 40 or 41 or 42 or 43 or 44

3 and 45

7 and 32 and 45

46 or 47

(exp animals/ or nonhuman/) not human/

48 not 49

(2015\* or 2016\* or 2017\*).dc,yr.

50 and 51

## Results

16623  
19397  
24602  
319  
64401  
106975  
117477  
280183  
518613  
403081  
435099  
344438  
151917  
74624  
127449  
123983  
38103  
184322  
487386  
551036  
544399  
328788  
124485  
126694  
75407  
79414  
126169  
146043  
114565  
37464  
52392  
2496276  
  
23478  
393  
626  
4327196  
226  
488921  
171145  
56028  
1194022  
200788  
120174  
634769  
1809201  
4203  
5067  
8287  
6039015  
7987

4327196  
2321
