# Supplementary material
Source: HighWire-hosted journal article supplement (https://bjsm.bmj.com/content/52/12/769)
Supplement: inline-supplementary-material-1 [file inline-supplementary-material-1.zip]

**Database:**

Cochrane Database of Systematic Reviews  
Cochrane Central Register of Controlled Trials  
Database of Abstracts of Reviews of Effects

**Interface:**

Cochrane Library, Wiley  
Cochrane Library, Wiley  
Cochrane Library, Wiley

Embase

OvidSP

Ovid MEDLINE(R) Epub Ahead of Print, In-Process OvidSP

Science Citation Index & Conference

Web of Science, Thomson Reuters

Proceedings Citation Index-Science

SPORTDiscus

EBSCOHost

**Total:**

Duplicates excluded:

Letters, comment, editorial, case reports  
excluded

Animal and plant studies excluded

**Final Total:**

| Coverage:                 | Dates:                        | Reviews:   | Trials:     | Combined:   |
|---------------------------|-------------------------------|------------|-------------|-------------|
| Issue 4 of 12, April 2017 | 04/04/17                      | 36         | 0           | 36          |
| Issue 3 of 12, March 2017 | 04/04/17                      | 0          | 749         | 749         |
| Issue 2 of 4, April 2015  | Not updated since last search | 0          | 0           | 0           |
| 1974 to 2017 April 03     | 04/04/17                      | 226        | 2321        | 2547        |
| 1946 to Present           | 04/04/17                      | 194        | 2494        | 2688        |
| 1945-present              |                               | 0          | 789         | 789         |
|                           |                               | 0          | 722         | 722         |
|                           |                               | <b>456</b> | <b>7075</b> | <b>7531</b> |
|                           |                               |            |             | 4485        |
|                           |                               |            |             | 17          |
|                           |                               |            |             | 26          |
|                           |                               | 214        | 2789        | 3003        |
