# Supplementary material
Source: HighWire-hosted journal article supplement (https://bjsm.bmj.com/content/52/12/769)
Supplement: inline-supplementary-material-3 [file inline-supplementary-material-3.docx]

Diastolic Blood Pressure (DBP)

ß =

p =

Systolic Blood Pressure (SBP)

ß =

p =

Low-Density Lipoprotein (LDL)

ß =

p =

Low-Density Lipoprotein (LDL)

ß =

p =

Triglyceride (TG)

ß =

p =

VO2max

ß =

p =

Body fat

Low-Density Lipoprotein (LDL)

The studies are sorted in the sequence of largest to smallest intervention group sample size


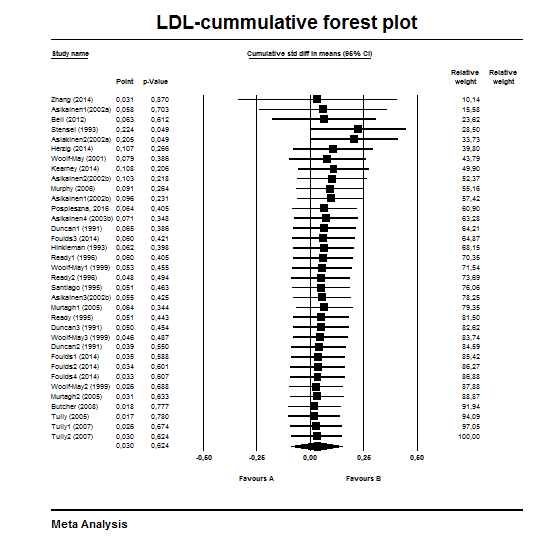


The studies are sorted in the sequence of largest to smallest intervention group sample size
